# Supplementary material for: Heart Failure Association-International Cardio-Oncology Society Risk Score Validation in HER2-Positive Breast Cancer
Source: MDPI journal article supplement (doi:10.3390/jcm12041278), 2023-02-06

# 1 - Unadjusted Patient Characteristics

| <b>Characteristics</b>      | <b>Overall (N=507)</b> | <b>Age≤ 65 (N=374)</b> | <b>Age≥ 65 (N=133)</b> |
|-----------------------------|------------------------|------------------------|------------------------|
| <b>Continuous variables</b> |                        |                        |                        |
| Age (Years)                 |                        |                        |                        |
| Median                      | 55                     | 51                     | 75                     |
| IQR                         | 48-66                  | 45-57.5                | 70-79                  |
| Mean                        | 57                     | 50                     | 75                     |
| Standard Deviation          | 13.7                   | 8.8                    | 7                      |
| Range                       | 23-95                  | 23-64                  | 65-95                  |

| <b>Characteristics</b>       | <b>Overall (N)</b> | <b>%</b> | <b>Age≤ 65 (N)</b> | <b>%</b> | <b>Age≥ 65 (N)</b> | <b>%</b> |
|------------------------------|--------------------|----------|--------------------|----------|--------------------|----------|
| <b>Categorical variables</b> |                    |          |                    |          |                    |          |
| Sex                          |                    |          |                    |          |                    |          |
| Female                       | 507                | 100      | 374                | 100      | 133                | 100      |
| Male                         | 0                  | 0        | 0                  | 0        | 0                  | 0        |
| Comorbidities                |                    |          |                    |          |                    |          |
| Diabetes                     | 23                 | 4.6      | 14                 | 3.7      | 9                  | 6.9      |
| Hypertension                 | 106                | 20.9     | 52                 | 13.9     | 54                 | 40.6     |
| Kidney disease               | 31                 | 6.1      | 11                 | 2.9      | 20                 | 15.2     |
| Coronary Artery Disease      | 0                  | 0        | 0                  | 0        | 0                  | 0        |
| Cardiomyopathy               | 1                  | 0.2      | 1                  | 0.3      | 0                  | 0        |
| Peripheral vascular disease  | 0                  | 0        | 0                  | 0        | 0                  | 0        |
| CHF                          | 17                 | 3.4      | 5                  | 1.3      | 12                 | 9        |
| Smoking                      | 106                | 20.9     | 81                 | 21.6     | 25                 | 18.8     |
| Status                       |                    |          |                    |          |                    |          |
| Dead                         | 236                | 46.5     | 159                | 42.5     | 77                 | 57.9     |
| Alive                        | 270                | 53.3     | 214                | 57.2     | 56                 | 42.1     |
| Grade                        |                    |          |                    |          |                    |          |
| 0                            | 26                 | 5.1      | 18                 | 4.8      | 8                  | 6        |
| 1                            | 5                  | 1        | 2                  | 0.5      | 3                  | 2.3      |
| 2                            | 183                | 36.1     | 138                | 36.9     | 45                 | 33.8     |

|                               |     |      |     |      |     |      |
|-------------------------------|-----|------|-----|------|-----|------|
| 3                             | 293 | 57.8 | 216 | 57.8 | 77  | 57.9 |
| Previous trastuzumab use      | 375 | 74   | 297 | 79.4 | 78  | 58.6 |
| Previous anthracycline use    | 87  | 17.2 | 79  | 21.1 | 8   | 6    |
| ER Status                     |     |      |     |      |     |      |
| Positive                      | 302 | 59.6 | 222 | 59.4 | 80  | 60.2 |
| Negative                      | 202 | 39.8 | 150 | 40.1 | 52  | 39   |
| PgR Status                    |     |      |     |      |     |      |
| Positive                      | 263 | 51.9 | 197 | 52.7 | 66  | 49.6 |
| Negative                      | 240 | 47.3 | 175 | 46.8 | 65  | 48.9 |
| Histology                     |     |      |     |      |     |      |
| Ductal                        | 421 | 83   | 313 | 83.7 | 108 | 81.2 |
| Lobular                       | 24  | 4.7  | 15  | 4    | 9   | 6.8  |
| Mixed                         | 4   | 0.4  | 2   | 0.5  | 2   | 1.5  |
| Other                         | 58  | 11.5 | 44  | 11.8 | 14  | 10.5 |
| Concurrent Therapy            |     |      |     |      |     |      |
| Diuretics                     | 0   | 0    | 0   | 0    | 0   | 0    |
| Betablockers                  | 52  | 10.3 | 18  | 4.8  | 34  | 25.6 |
| Statins                       | 85  | 16.8 | 37  | 9.9  | 48  | 36.1 |
| Anticoagulant                 | 22  | 4.3  | 10  | 2.7  | 12  | 9    |
| Calcium antagonists           | 0   | 0    | 0   | 0    | 0   | 0    |
| ACE inhibitors                | 63  | 12.4 | 31  | 8.3  | 32  | 24.1 |
| Angiotensin receptor blockers | 63  | 12.4 | 31  | 8.3  | 32  | 24.1 |

## 2 - ROC Graph Related to Treatment

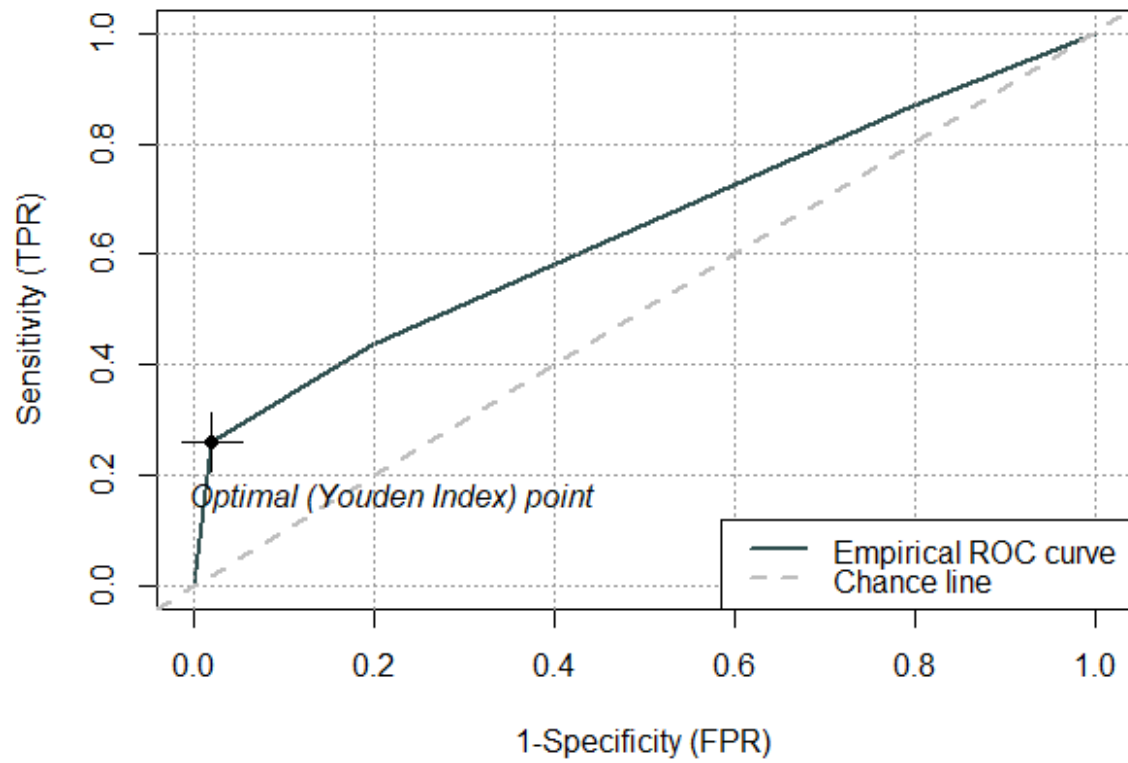

### 3 - ROC graph relating to death

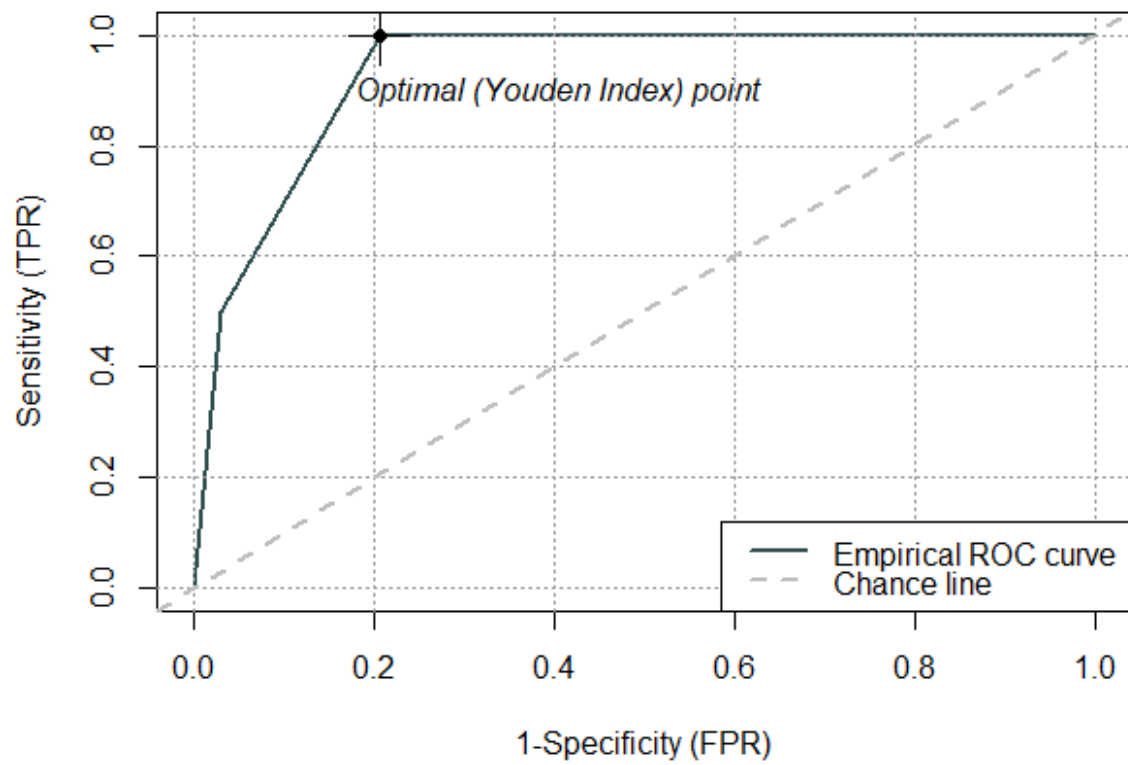

#### 4 - ROC Graph relating to drop in LVEF <50%

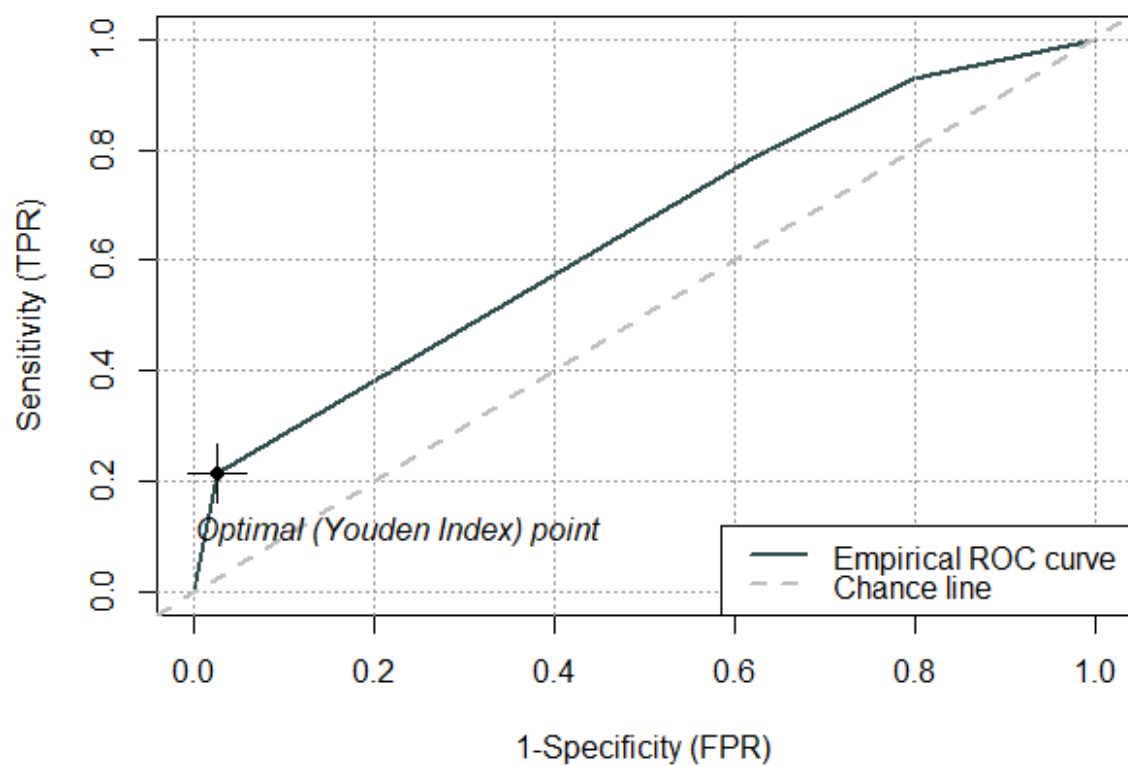

Supplement: s1 [file s1]
